# Supplementary material for: Graphene oxide/polypyrrole nanocomposites: one-step electrochemical doping, coating and synergistic effect for energy storage
Source: Royal Society of Chemistry journal article supplement (doi:10.1039/c2jm16699b), 2012-01-01
Supplement: c2jm16699b.pdf [file c2jm16699b.pdf]

# Graphene oxide/Polypyrrole Nanocomposites: One-step Electrochemical Coating, Doping and Synergistic Effect for Energy Storage

Chengzhou Zhu, Junfeng Zhai, Dan Wen, Shaojun Dong\*

State Key Laboratory of Electroanalytical Chemistry, Changchun Institute of Applied Chemistry,  
Chinese Academy of Sciences,  
Changchun 130022, China

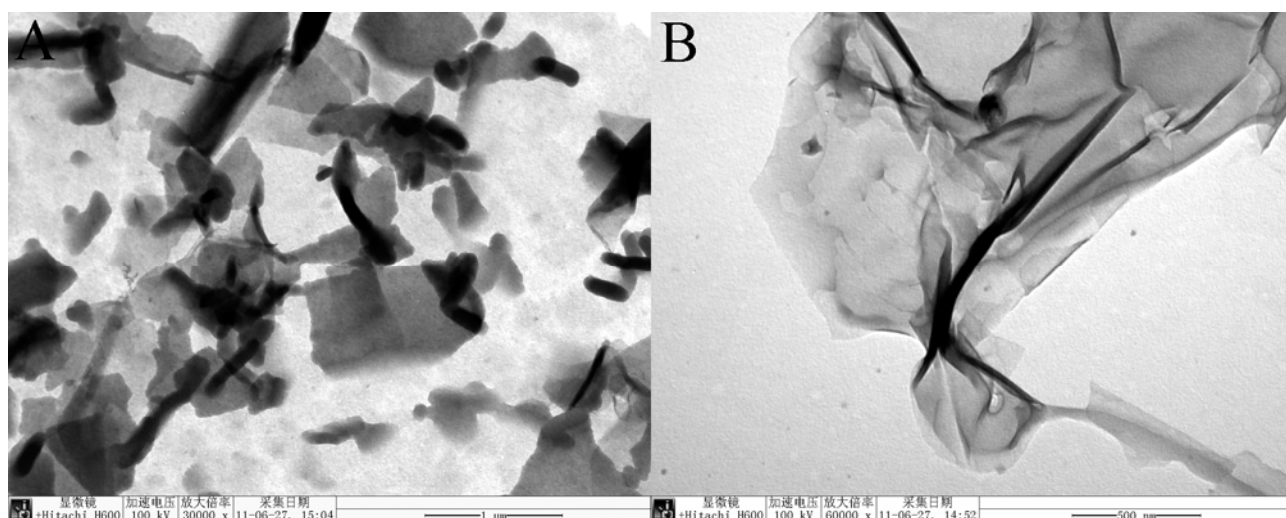

Figure S1. The typical TEM images of the as-prepared GO/PPy nanocomposites.

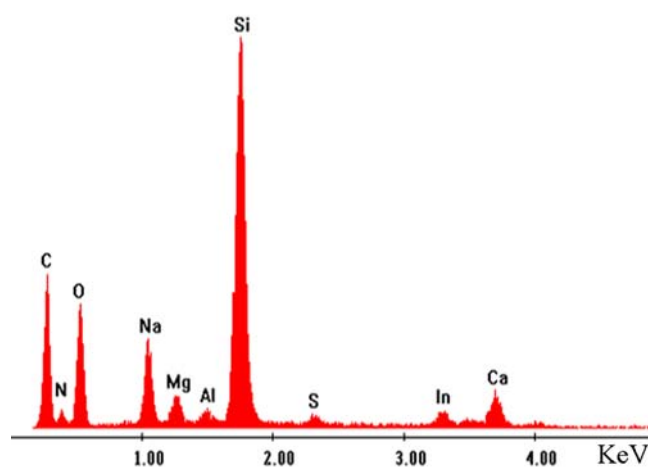

Figure S2. Energy dispersive X-ray (EDX) spectrum of the obtained GO/PPy  
nanocomposites.

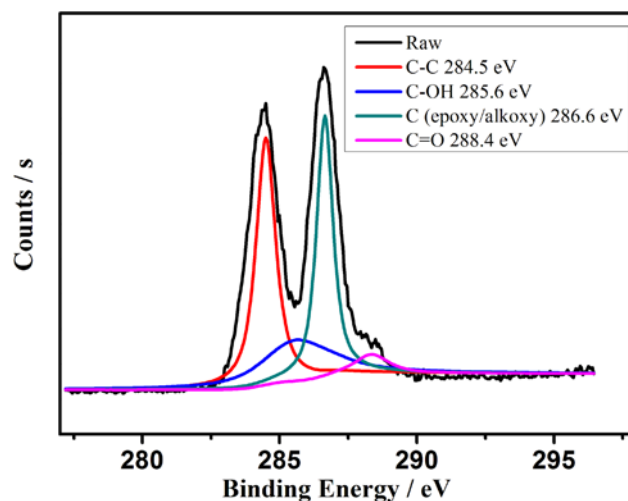

Figure S3. The deconvoluted C 1s XPS spectra of GO.

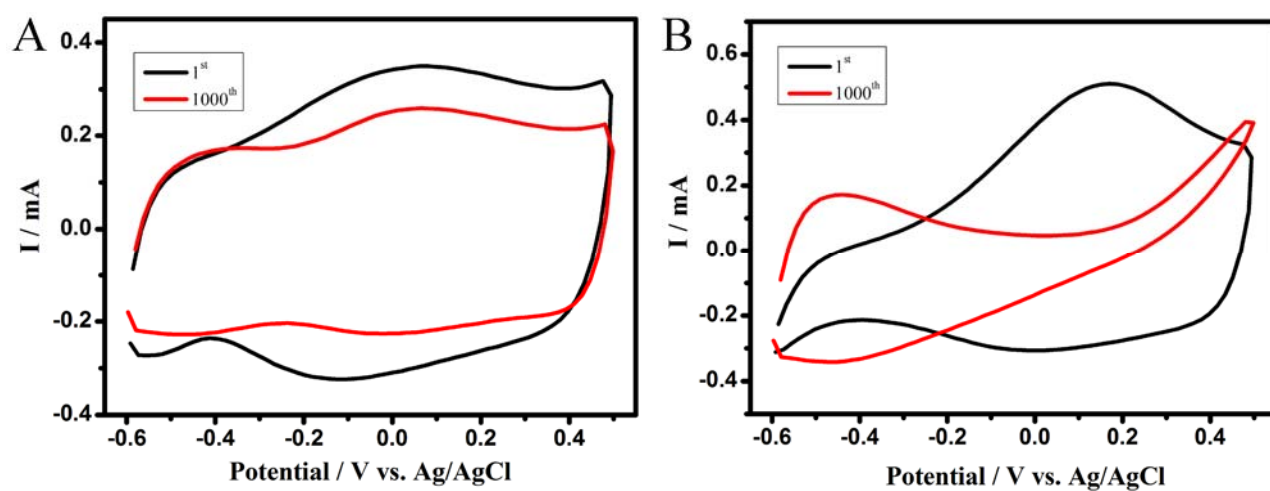

Figure S4. CV curves of electrodeposited (A) GO/PPy nanocomposites and pure PPy in 0.1 M KCl before (black line) and after (red line) cycling 1000 times at 0.1 V/s.

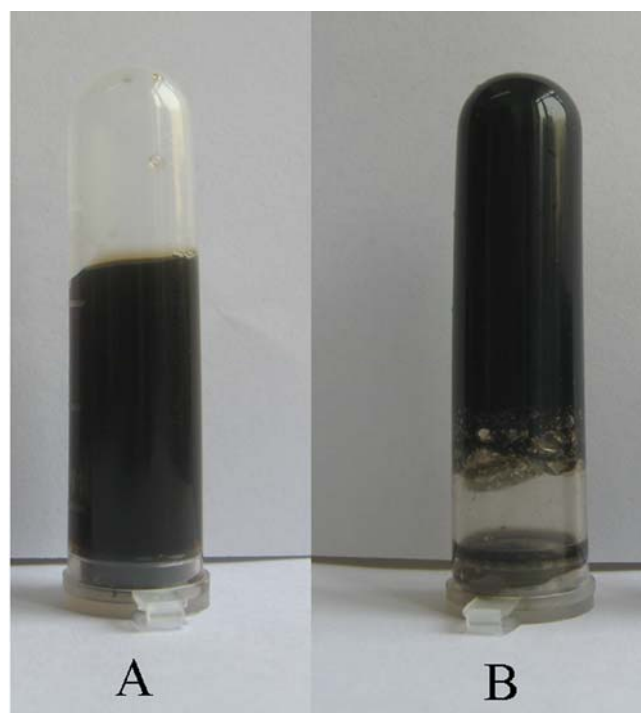

Figure S5. Photographs of GO/Py mixtures with different time: 0 h (A), 10 h (B).

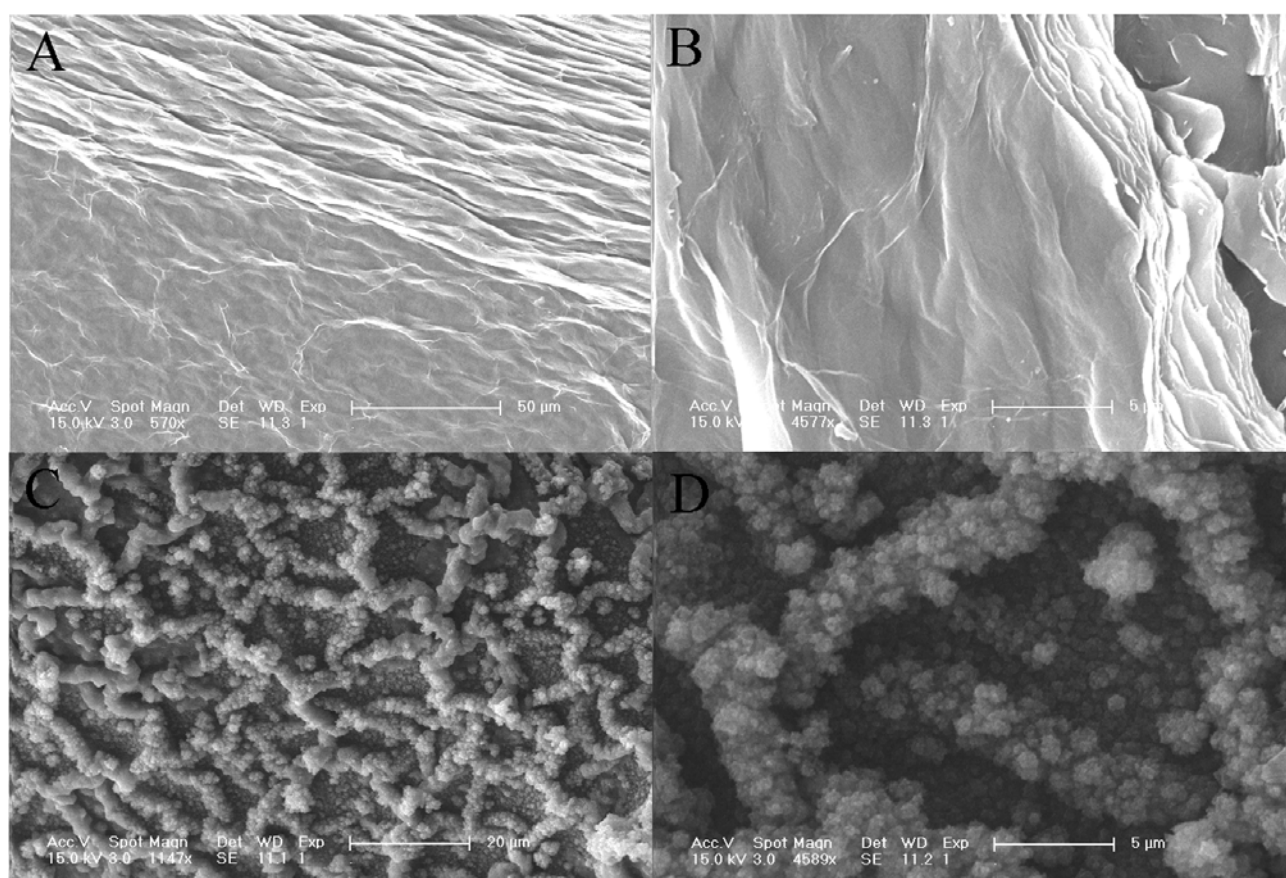

Figure S6. SEM images of the electrodeposited GO/PEDOT nanocomposites (A, B)  
and pure PEDOT (C, D).
